# Supplementary material
Source: PubMed Central journal article supplement (PMC2836615)
Supplement: 0908569107_pnas.0908569107_SI.pdf [file 0908569107_pnas.0908569107_SI.pdf]

# Supporting Information

Zhao et al. 10.1073/pnas.0908569107

## SI Text

**Protein Expression and Purification.** The coding region of gp1 was PCR-amplified from the Sf6 genomic DNA using the following primers: 5'- CCA CAT ATG GCG ACT GAA CCA AAA G-3', which contains a Nde1 site followed by the N-terminal coding sequence of gp1, and 5'- GGC CTC GAG TCA TTT TCC GAA TAG AGT GCT C -3', which harbors the C-terminus of gp1, a stop codon and a Xho1 site. The PCR product was digested with appropriate restriction enzymes, gel purified, and cloned into the same sites of the vector pET28b (Novagen). The resulting construct contained the entire coding sequence of gp1 with an N-terminal His-tag and a thrombin cleavage site before the gp1 sequence. Plasmids was transformed in *E. coli* strain BL21(DE3) plysS (Novagen). The strain was grown at 30 °C in LB media supplemented with 30 µg/ml Kanamycin. The gp1 expression was induced at an OD600 of 0.5 by the addition of 1mM IPTG and shaken for three and half hours. Cells were harvested by centrifugation (10 min, 6,000 g), washed in cold buffer A (20 mM Tris-HCl pH8.5, 500 mM NaCl, 10 mM β-mercaptoethanol, 30 mM imidazole) and frozen at -20 °C. The cells were thawed at room temperature, and 1 mM PMSF (phenylmethylsulfonyl fluoride) was added; the suspension was placed on ice and lysed by three passages through a French press. The sample was centrifuged for 60 min at 13,000 rpm (rotor JA-20, Beckman). The supernatant was loaded on 2 mL resin Ni-NTA column balanced with buffer A, washed with buffer A and eluted with buffer A and 50 mM, 100, 200, and 500 mM imidazole. Most gp1 was eluted with 200 mM imidazole, and the fractions of 200 and 500 mM imidazole elution were pooled and loaded on size exclusion chromatography (Sephacryl S-300, GE healthcare). The single gp1 peak showed an estimated molecular weight of approximately 140 kDa and was concentrated with Ultrafree (Millipore, MW cutoff 100,000) concentrator to approximately 10 mg/mL and stored at 4 °C. The typical yield was 20 mg of purified protein per liter of bacterial culture. The N-terminal His-tag was removed by incubation of a solution of 2 U of thrombin (Sigma) per milligram of gp1 for 20 h at 4 °C. Prior to crystallization, the thrombin was removed by *p*-aminobenzamidine-agarose (Sigma) and the cleaved gp1 subunits were isolated from His-tag and uncleaved protein by Ni-affinity column chromatography. The same purification procedures were followed for Se-methionine-substituted gp1, except that the strain B834 (DE3)plysS was used.

Site-directed mutagenesis was conducted upon the plasmid pET28b encompassing the gp1 gene so that the lysine residue 59 in gp1 was substituted with a glutamate residue (K59E). The primers (5'-TGAGGATTTTCGCGACGAGTACGCGAAGGCAAC-3' and 5'-GTTGCCTTCGCGTACTCGTCGCGAAAATCCTCA-3') were used. A QuikChange mutagenesis kit (Stratagene) was used for the site-directed mutagenesis. The resultant plasmid was confirmed by DNA sequencing. The expression and purification of mutant gp1-K59E is essentially the same as the native gp1.

**Electron Microscopy.** The purified gp1 was diluted to 0.08 mg/mL (4.5 µM), and adsorbed for 1 min on a 300 mesh Formvar copper EM grid coated with a carbon film, followed by washing with deionized water for 5 s and staining with 1% uranyl acetate for 1 min. The grid was air dried, and was inspected on a 200 kV Tecnai F20 G2 transmission electron microscope equipped with a field emission gun.

**Electrophoretic Mobility Shift Assay.** The gp1- and gp2-coding regions (423 and 1,413 bp respectively) in the Sf6 genome are adjacent. A DNA fragment corresponding to the DNA sequence comprising the coding regions of gp1 and gp2 (1,836 bp in total) was generated by PCR using Taq DNA polymerase (New England Biolabs) and the oligonucleotides 5'-CCA CAT ATG GCG ACT GAA CCA AAA G-3' and 5'-GGC CTC GAG TTA CCA ACC GGA GGA TGA GGG-3' as the primers. The purified gp1 (25, 50, 75, 100, and 125 µM) was incubated with the DNA fragment (approximately 25 nM) in 12 µL reaction solution containing 10 mM Tris-HCl pH 7.8, 100 mM NaCl, 1mM DTT and 1 mM ATP at room temperature for 30 min, and was loaded on 1% (w/v) agarose gel followed by ethidium bromide staining.

Electrophoretic mobility shift assay of Sf6 gp1 with a 1230 bp nonspecific DNA (from a Gram-positive bacterium) and of Sf6 gp1-K59E mutant with gp1-gp2 coding DNA and nonspecific DNA was performed essentially in the same way as described previously.

**Fitting of Molecular Structures.** The coordinates of DNA-binding domains of Sf6 gp1 and phage lambda gpNu1 were aligned using MatchMaker in the program UCSF Chimera (1) and were manually adjusted to optimize superimposition of secondary structural elements.

In the aforementioned molecular fitting, the helix α1 (residues 16–26) of Sf6 gp1 was aligned with the α-helix (residues 17–27) in the winged helix-turn-helix motif of gpNu1 that was implicated in phage lambda DNA recognition (Fig. S4). This suggests that helix α1 is directly involved in gp1:DNA interaction and can insert into the major groove of the bound DNA as in the typical DNA-binding mode of many DNA-binding proteins such as transcription factors. To model the gp1:DNA binding, we used the x-ray structure of a transcription factor Spo0A in complex with its specific DNA motif (PDB code 1lq1) (2). The α-helix (residues 210–220) in Spo0A inserted into the DNA major groove. Thus, the molecule A of the Spo0A structure with bound DNA was superimposed onto the Sf6 gp1 structure by fitting the helix (residues 210–220) of Spo0A with the helix α1 of Sf6 gp1, and the resultant DNA was replaced with a standard B-form dsDNA created with the program 3DNA (3). The DNA was slightly adjusted to avoid steric hindrance with the gp1 region of residues 34–35.

1. Pettersen EF, et al. (2004) UCSF Chimera—A visualization system for exploratory research and analysis. *J Comput Chem* 25(13):1605–1612
2. Zhao H, et al. (2002) DNA complexed structure of the key transcription factor initiating development in sporulating bacteria. *Structure* 10(8):1041–1050

3. Lu XJ, Olson WK (2008) 3DNA: A versatile, integrated software system for the analysis, rebuilding and visualization of three-dimensional nucleic-acid structures. *Nat Protoc* 3(7):1213–1227





**Table S1. X-ray data collection and structure refinement statistics**

| Data collection                                                  |                                  |                     |                     |                     |
|------------------------------------------------------------------|----------------------------------|---------------------|---------------------|---------------------|
| Protein                                                          | gp1 native                       |                     | Se-Met gp1          |                     |
| Beamline                                                         | SSRL 11-1                        | SSRL 7-1            | SSRL 7-1            | SSRL 7-1            |
| Wavelength (Å)                                                   | 1.00062                          | Peak 0.97910        | Remote 1.03317      | Inflection 0.97946  |
| Resolution (Å)                                                   | 50–1.65 (1.71–1.65) <sup>a</sup> | 50–1.86 (1.93–1.86) | 50–1.86 (1.93–1.86) | 50–1.86 (1.93–1.86) |
| No. measurements                                                 | 340,420                          | 176,236             | 176,715             | 178,374             |
| No. unique reflections                                           | 35,597                           | 24,582              | 24,624              | 24,797              |
| Completeness(%)                                                  | 99.6(100.0)                      | 98.7(99.9)          | 98.8(99.8)          | 98.7(99.5)          |
| <i>I</i> /σ                                                      | 63.9(5.4)                        | 34.7(3.4)           | 41.0(4.0)           | 37.0(3.2)           |
| <i>R</i> <sub>merge</sub> (%) <sup>b</sup>                       | 4.8(46.0)                        | 6.5(50.6)           | 4.9(44.2)           | 6.1(54.9)           |
| Space group                                                      | <i>P</i> 42(1)2                  | <i>P</i> 42(1)2     | <i>P</i> 42(1)2     | <i>P</i> 42(1)2     |
| Unit cell (Å)                                                    | a = 88.9, c = 72.6               |                     | a = 88.8, c = 72.5  |                     |
| Structure refinement                                             |                                  |                     |                     |                     |
| Resolution (Å)                                                   | 20–1.65                          |                     |                     |                     |
| <i>R</i> <sub>work</sub> / <i>R</i> <sub>free</sub> <sup>c</sup> | 0.22/0.25                        |                     |                     |                     |
| Number of atoms                                                  |                                  |                     |                     |                     |
| Protein                                                          | 1,981                            |                     |                     |                     |
| Water                                                            | 255                              |                     |                     |                     |
| B-factors                                                        |                                  |                     |                     |                     |
| Protein                                                          | 26.4                             |                     |                     |                     |
| Water                                                            | 41.5                             |                     |                     |                     |
| R.m.s deviations                                                 |                                  |                     |                     |                     |
| Bond lengths (Å)                                                 | 0.011                            |                     |                     |                     |
| Bond angles (°)                                                  | 1.3                              |                     |                     |                     |
| Ramachandran plot statistics                                     |                                  |                     |                     |                     |
| Residues in most favoured regions                                | 94.8%                            |                     |                     |                     |
| Residues in additional allowed regions                           | 5.2%                             |                     |                     |                     |
| Residues in generously allowed regions                           | 0.0%                             |                     |                     |                     |
| Residues in disallowed regions                                   | 0.0%                             |                     |                     |                     |

<sup>a</sup>Values in the parentheses are for the outmost resolution shells.

<sup>b</sup> $R_{\text{merge}} = \frac{\sum_{hkl} \sum_i |I_i(hkl) - \langle I(hkl) \rangle|}{\sum_{hkl} \sum_i I_i(hkl)}$ , where  $I_i(hkl)$  is the observed intensity of reflection  $hkl$  and  $\langle I(hkl) \rangle$  is the averaged intensity of symmetry-equivalent measurements.

<sup>c</sup> $R_{\text{work}} = \frac{\sum_{hkl} ||F_{\text{obs}}| - |F_{\text{calc}}||}{\sum_{hkl} |F_{\text{obs}}|}$ , where  $F_{\text{obs}}$  and  $F_{\text{calc}}$  are structure factors of the observed reflections and those calculated from the refined model, respectively.  $R_{\text{free}}$  has the same formula as  $R_{\text{work}}$ , except that it was calculated against a test set of the data that was not included in the refinement.
